# Supplementary material
Source: MDPI journal article supplement (https://www.mdpi.com/2073-4468/11/1/4)

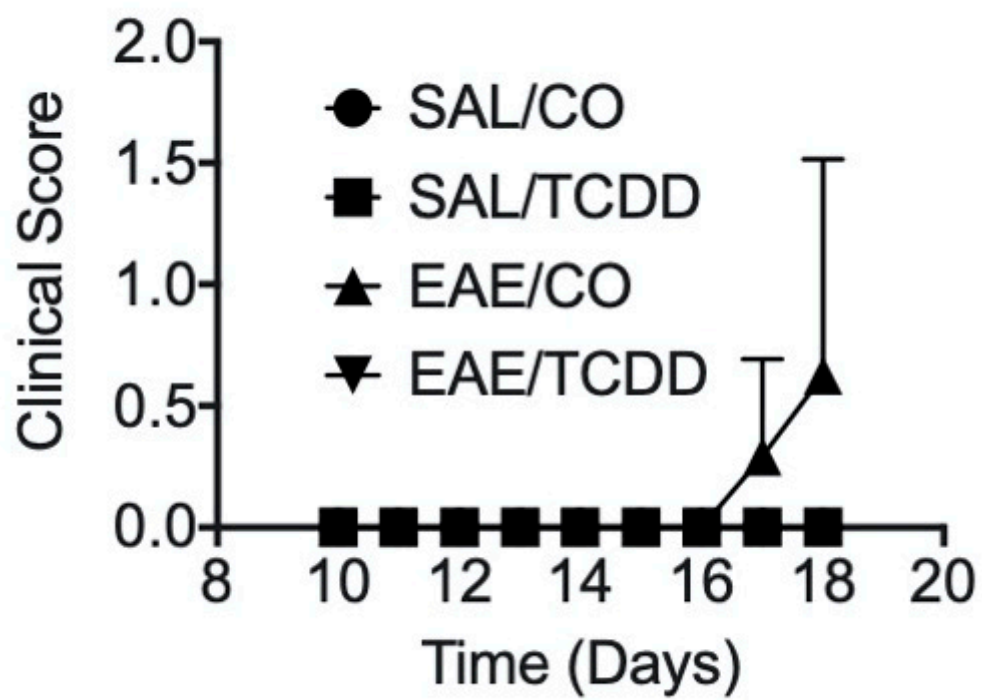

**Figure S1.** EAE clinical scores.

Supplement: s1 [file s1]
